# Supplementary material
Source: Springer Nature journal article supplement (https://www.springermedizin.de/resource/supplementary/12985_2011_1658_MOESM4_ESM.pdf/9610346)

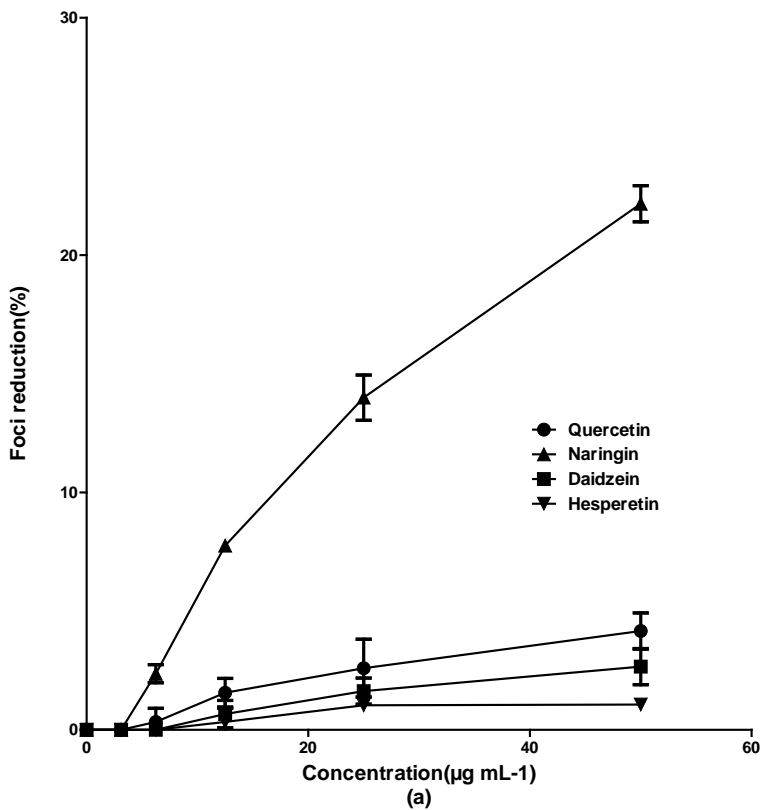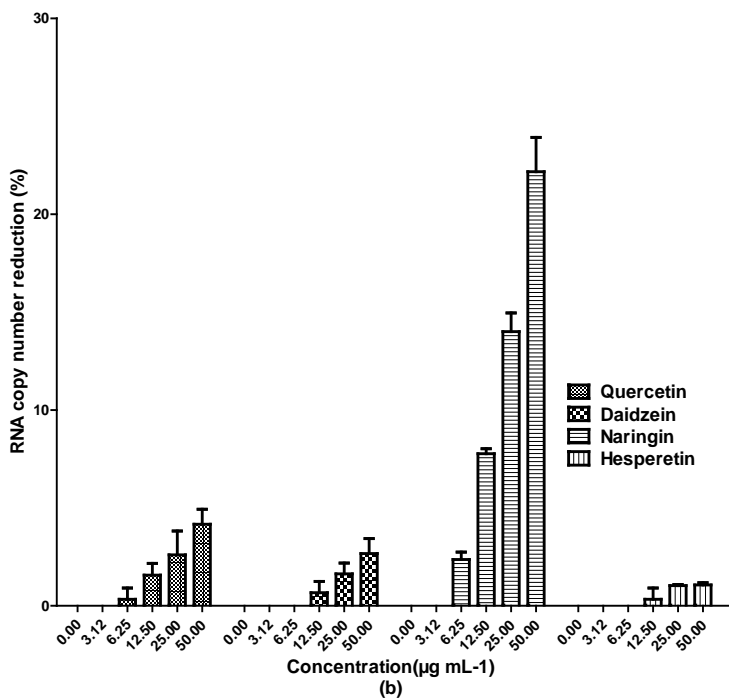

Supplement: MOESM4 [file 9610346]
